# Supplementary material
Source: PubMed Central journal article supplement (PMC4650424)
Supplement: cr2015121x1.pdf [file cr2015121x1.pdf]

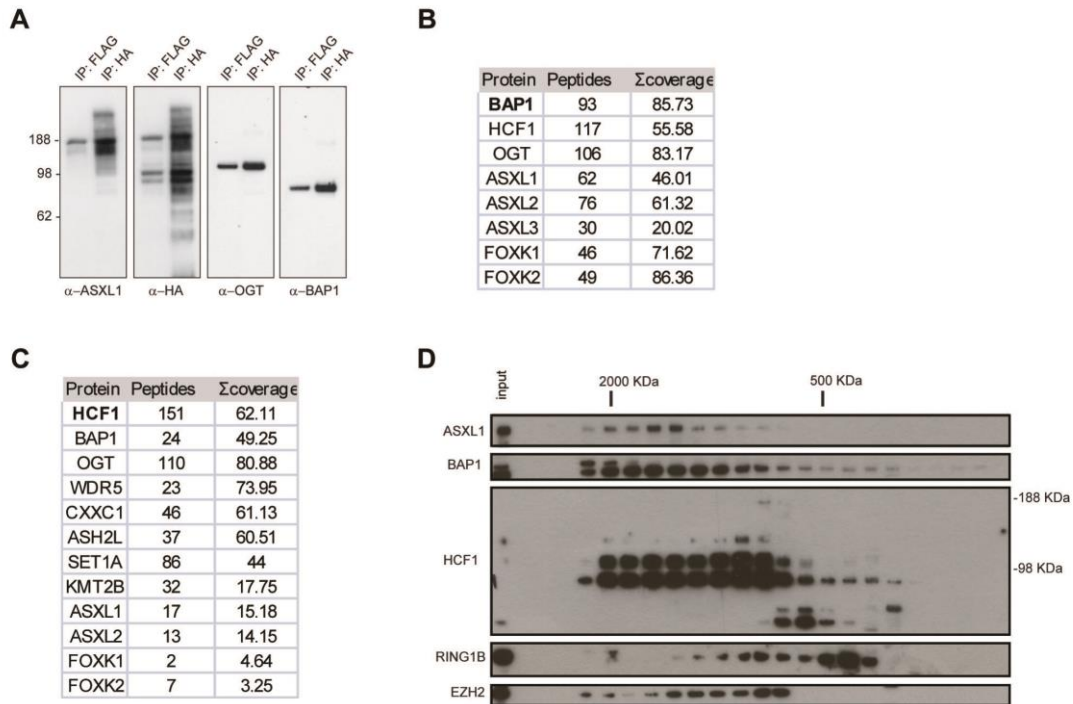

**Supplementary information, Figure S1 ASXL1 and BAP1 form a complex similar to PR-DUB, separate from PRC2.**

(A) Western blotting analyses to validate the mass spectrometry (MS)-identified proteins in the FLAG and HA eluates. Molecular weight markers are indicated on the left side (kDa). (B-C) Summary of the peptides identified by MS from a FLAG–HA tandem purification of FLAG–HA–BAP1 (B) or HCF1 (C) expressed in Flp-In T-REX 293 cells. Observed number of peptides and coverage rate were indicated for each protein. (D) WB analyses of 293T extracts fractionated by size exclusion chromatography were performed using antibodies for the indicated proteins.. Multiple bands were detected for the cleaved protein of HCF1. The molecular weight for indicated fractions is labeled on the top and for the SDS-PAGE gel to the right (kDa).
