# Supplementary material
Source: PubMed Central journal article supplement (PMC4650424)
Supplement: cr2015121x2.pdf [file cr2015121x2.pdf]

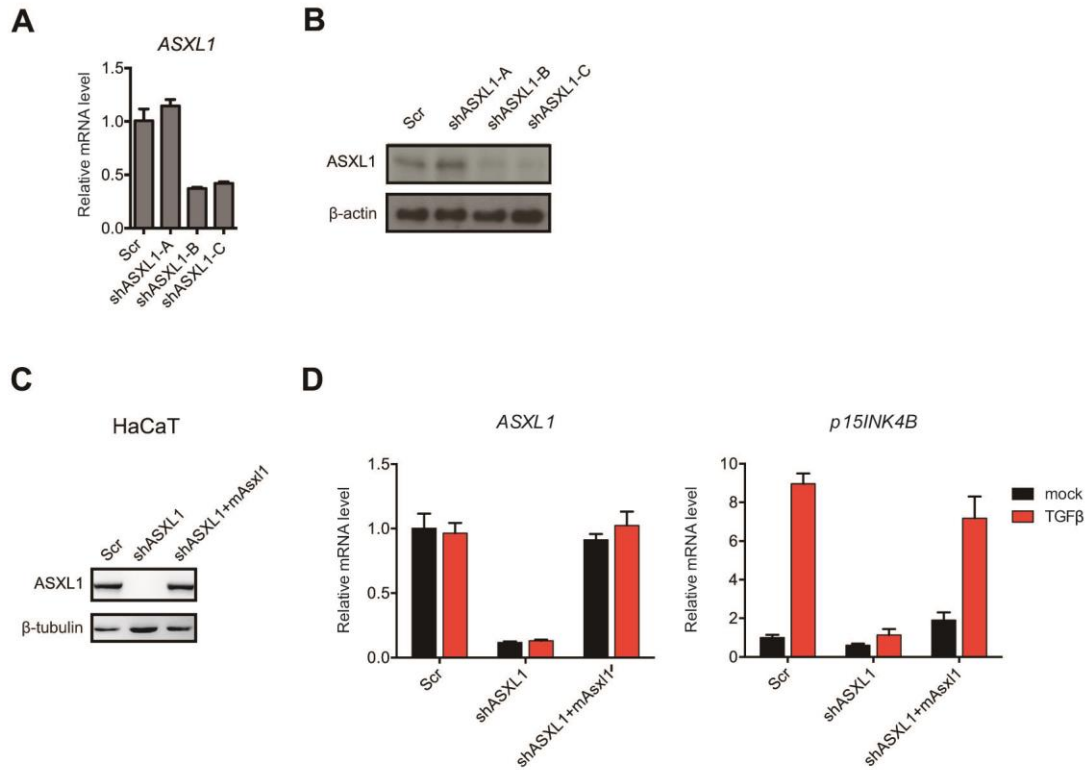

**Supplementary information, Figure S2 Depletion of ASXL1 attenuates TGFβ-induced *p15INK4B* expression.**

(A-B) Efficient knockdown of ASXL1 in TIG3 cells. The expression levels of ASXL1 in ASXL1-depleted TIG3 cells using three different shRNA constructs targeting ASXL1 (shASXL1-A, shASXL1-B and shASXL1-C) and scrambled control (Scr) were determined by Real-time qPCR analysis (A) and WB analysis (B). The error bars for (A) denote s.d., n=2. β-actin served as a loading control for total protein in (B). (C) WB analysis confirmed the successful re-introduction of mASXL1 in ASXL1-depleted (shASXL1) HaCaT cells. β-tubulin was used as loading control. (D) Real-time qPCR analyses to determine the relative mRNA levels of ASXL1 and p15INK4B in the indicated group of HaCaT cells untreated (mock) or treated by TGFβ for six hours. The error bars denote s.d., n=2.
