# Supplementary material
Source: PubMed Central journal article supplement (PMC4650424)
Supplement: cr2015121x3.pdf [file cr2015121x3.pdf]

**A**



**B**



**C**



**Supplementary information, Figure S3 Downregulation of *Asx1* or *Bap1* attenuates IL6- and LPS-induced *p15Ink4b* activation in M1 cells.**

(A) Real-time qPCR analyses to determine the relative mRNA levels of *Asx1* and *p15Ink4b* in control (Scr) or *Asx1*-depleted (sh*Asx1*-1 and -2) M1 cells at different times of LPS treatments. The error bars denote s.d., n=2. (B) WB analysis confirmed the downregulation of *Asx1* and *Bap1* in *Asx1* or *Bap1*-deleted (lentiCRISPR v2-*Asx1* and *Bap1*) M1 cells.  $\beta$ -tubulin was used as loading control. (C) Real-time qPCR analyses to determine the relative mRNA levels of *p16Ink4a* and *p15Ink4b* in control (WT) or *Asx1*-deleted (lentiCRISPR v2-*Asx1* and *Bap1*) M1 cells untreated (mock) or treated by IL6/LPS for eight hours. The error bars denote s.d., n=2.
