# Supplementary material
Source: PubMed Central journal article supplement (PMC4650424)
Supplement: cr2015121x4.pdf [file cr2015121x4.pdf]

## Wu, et al, Supplementary information, Figure S4

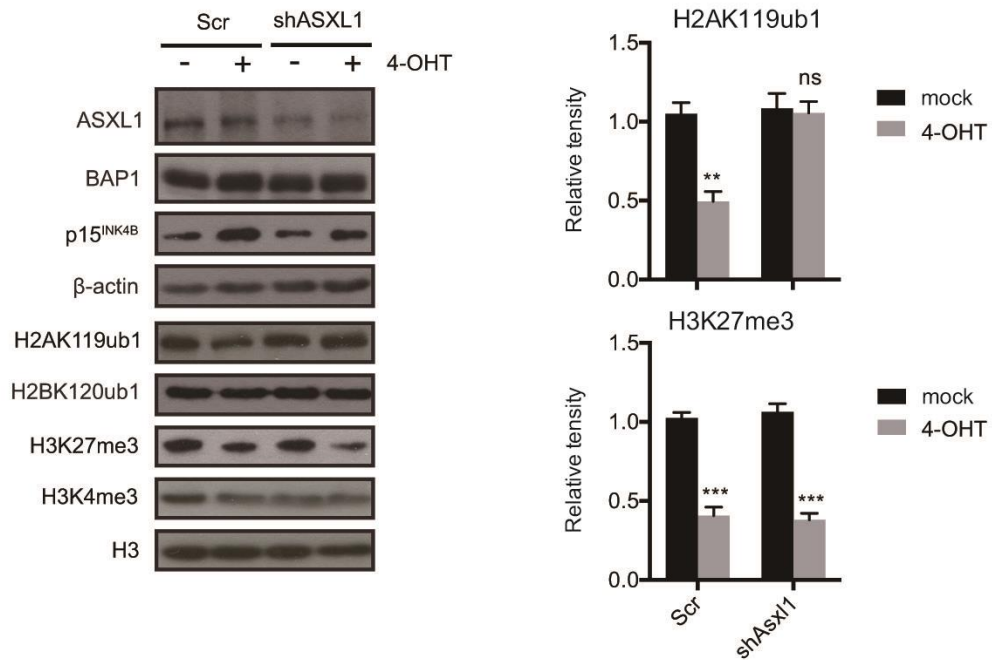

### Supplementary information, Figure S4 ASXL1 is required for oncogenic BRAF-induced decrease of H2AK119ub1 levels.

Expression levels of ASXL1, BAP1 and p15<sup>INK4B</sup>, and the global levels of indicated histone marks in the indicated TIG3 ΔBRAF-ER cells were determined by WB analyses. β-actin and H3 were used as loading control respectively for total protein or acid extracted histones. The signals of H2AK119ub1 and H3K27me3 bands were quantified by Quality One. Number of biological replicates n=2.
