# Supplementary material
Source: PubMed Central journal article supplement (PMC4650424)
Supplement: cr2015121x5.pdf [file cr2015121x5.pdf]

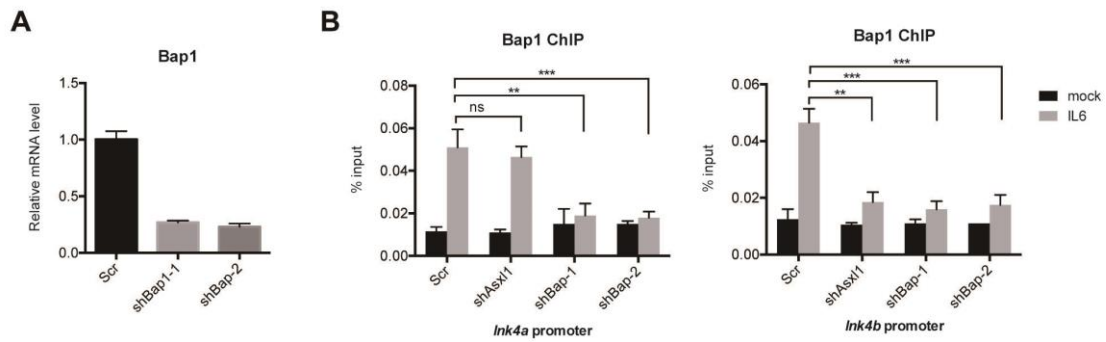

**Supplementary information, Figure S5 IL6-induced Bap1 binding is prevented by the depletion of Asx11 specifically at the *Ink4b* locus.**

(A) Real-time qPCR analyses to determine the relative mRNA levels of Bap1 in control (Scr) or Bap1-depleted (shBap1-1 and -2) M1 cells. The error bars denote s.d., n=2. (C) ChIP-qPCR analysis to determine the Bap1 enrichment on both *Ink4a* and *Ink4b* promoters in control (Scr), Asx11 or Bap1-deleted (shAsx11, shBap1-1 and -2) M1 cells untreated (mock) or treated by IL6. The error bars denote s.d., n=2.
