# Supplementary material
Source: PubMed Central journal article supplement (PMC4650424)
Supplement: cr2015121x6.pdf [file cr2015121x6.pdf]

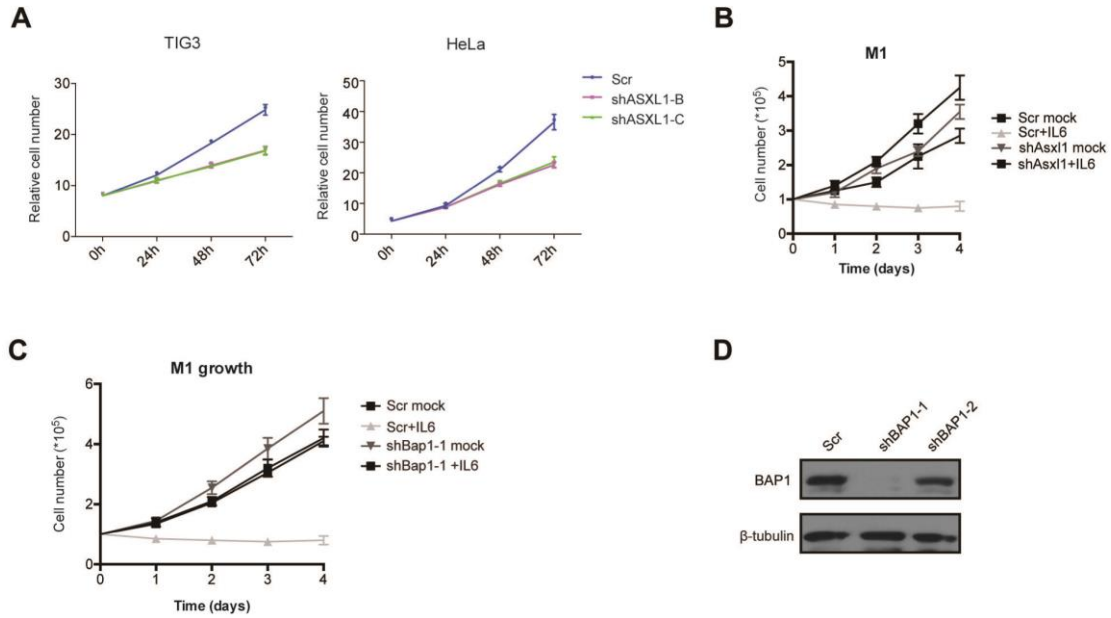

**Supplementary information, Figure S6 Depletion of ASXL1 inhibits cell growth.** (A) Growth curves of ASXL1-depleted TIG3, HeLa cells (shASXL1-B and shASXL1-C) compared with controls (Scr). (B-C) Growth curves of Asx11 or Bap1-depleted M1 cells (shAsx11, shBap1-1) compared with controls (Scr), untreated (mock) or treated by IL6 at the indicated times. The error bars denote s.d., n=2. (D) WB analysis confirmed the downregulation of BAP1 in BAP1-depleted (shBAP1-1 and -2) 293 cells.  $\beta$ -tubulin was used as loading control.
